# Supplementary material for: Upregulated Ca2+ Release from the Endoplasmic Reticulum Leads to Impaired Presynaptic Function in Familial Alzheimer’s Disease
Source: MDPI journal article supplement (doi:10.3390/cells11142167), 2022-07-11
Supplement: s1 [file s1]

## Supplementary Figures

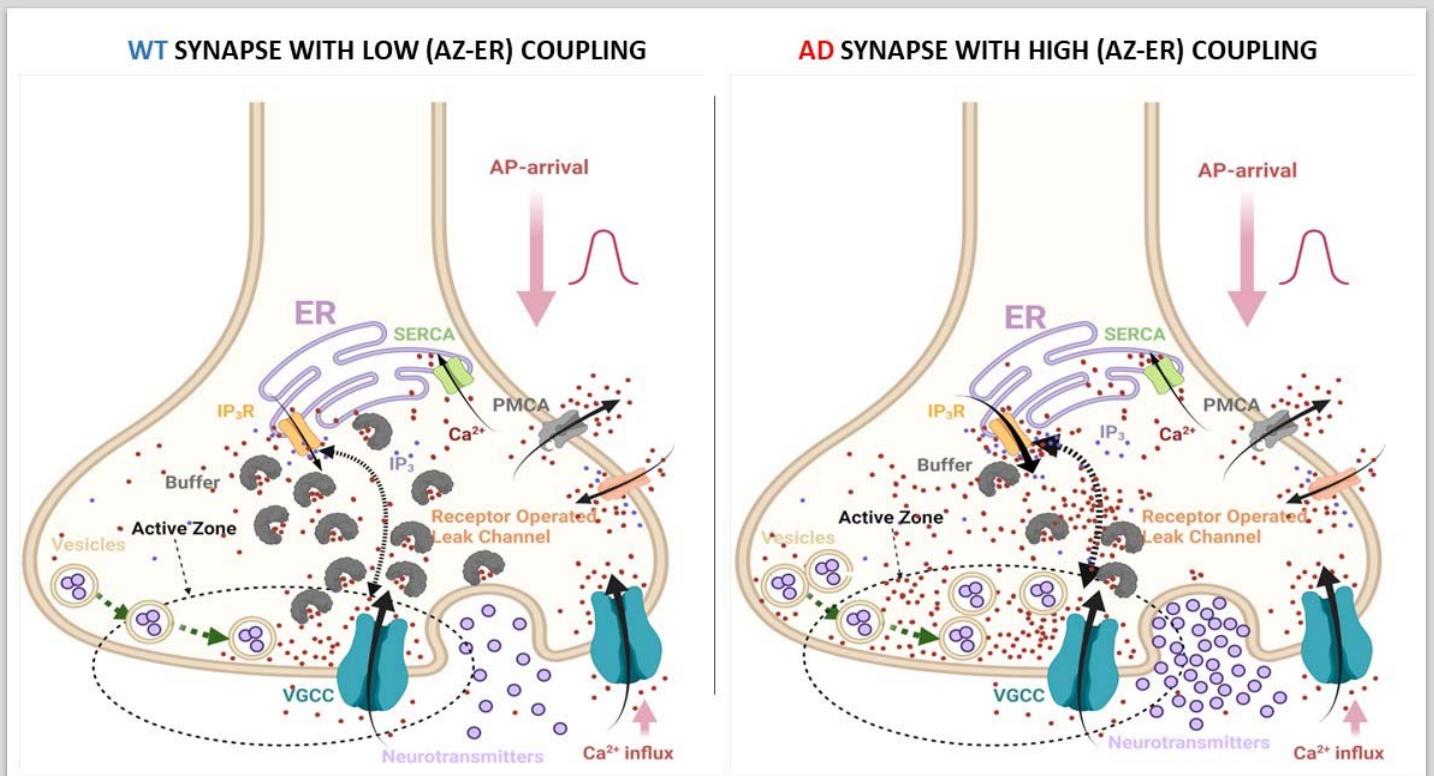

**Figure S1.**  $\text{Ca}^{2+}$  homeostasis and neurotransmission scheme in FAD and WT synapses. WT synapse (Left) with low ER-AZ coupling (thin dashed arrows). high buffering (grey half annuli), moderate AZ  $\text{Ca}^{2+}$  concentration, neurotransmission, and IP<sub>3</sub>R activity (thin arrows), and FAD synapse (Right) with high ER-AZ coupling (thick dashed arrows), low buffering, elevated  $\text{Ca}^{2+}$  concentration, dysregulated and initially elevated release of neurotransmitters (purple) into the synapse, and IP<sub>3</sub>R activity (thick arrows).  $\text{Ca}^{2+}$  is represented by small red circles and IP<sub>3</sub> by small blue ones.

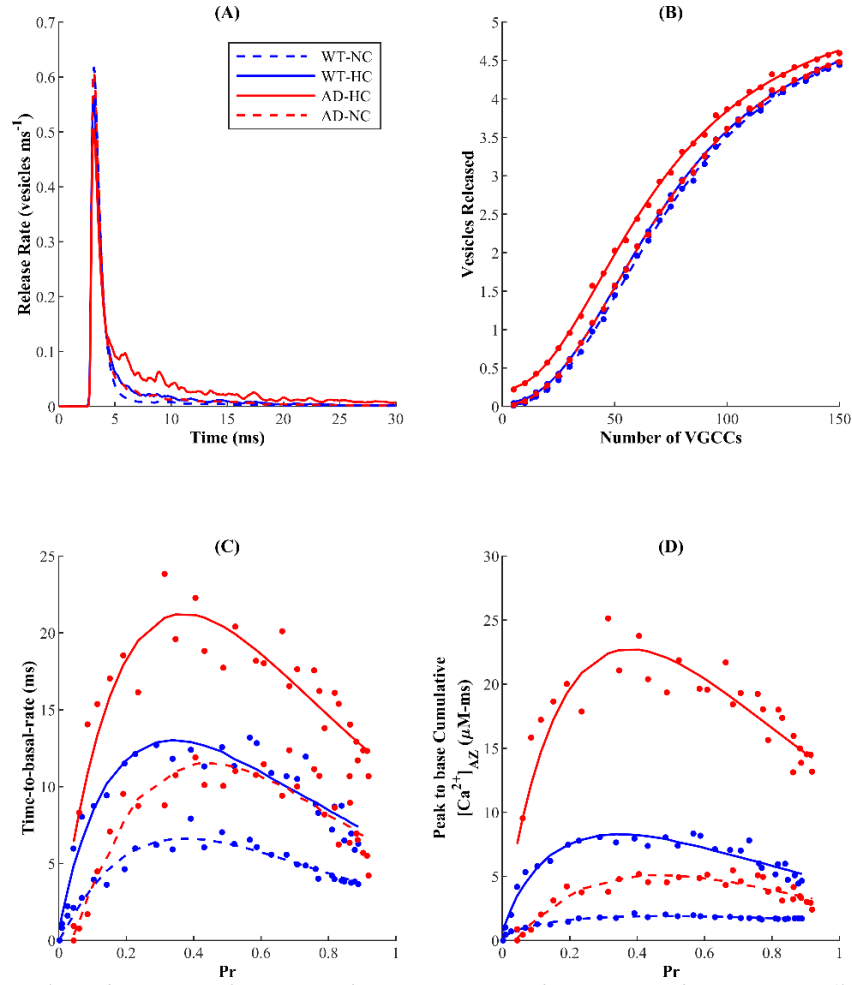

**Figure S2.** *Coupling between the microdomains around  $IP_3Rs$  and VGCCs influences  $Ca^{2+}$  in the AZ and neurotransmission profiles in FAD and WT synapses.* Transmitter release rates within 30 ms of stimulus (A) and total vesicles released (B) for different coupling configurations. Decay time of peak release rate (C) and cumulative  $Ca^{2+}$  concentration from peak to basal rate in the AZ (D) are markedly influenced by coupling.

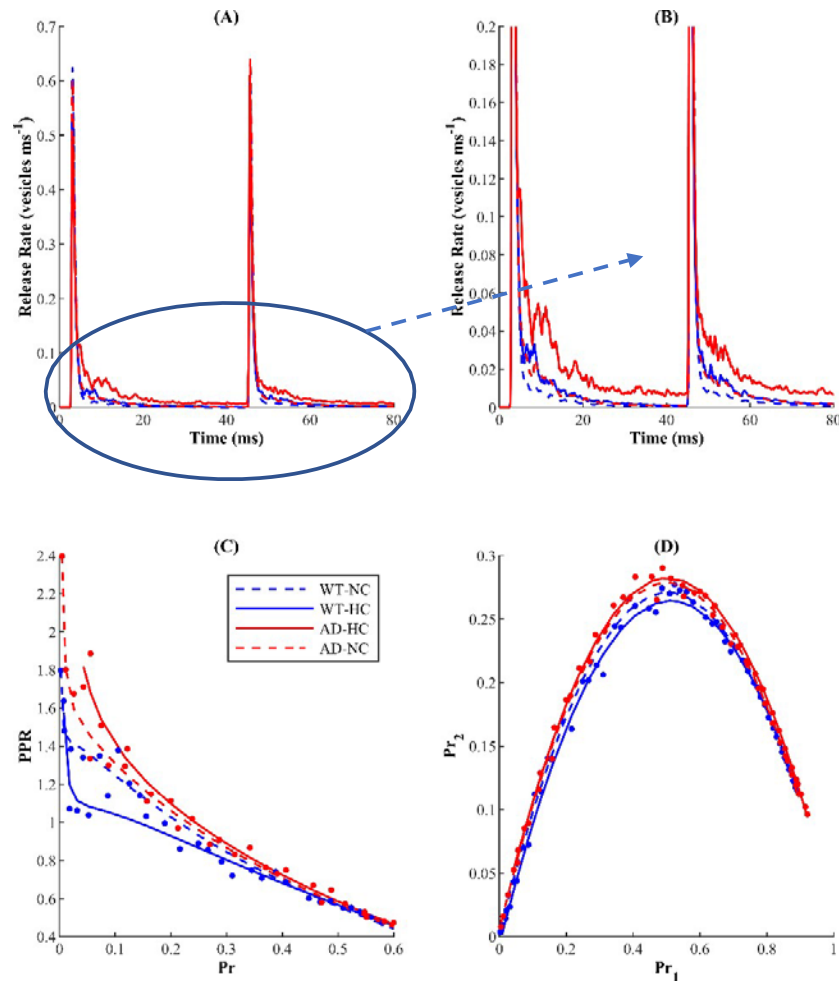

**Figure S3.** Stronger coupling between the microdomain of IP<sub>3</sub>Rs cluster and AZ exacerbate the release rate and enhanced PPR in FAD-affected synapses but only marginally affect the bell-shaped behavior of  $Pr_2$  as a function of  $Pr_1$ . Release profile (A) (zoomed-in (B)) following paired-pulse stimulation protocol shows an increase in release rate by stronger coupling in the microdomain of IP<sub>3</sub>Rs cluster and AZ in both WT and FAD-affected synapses. (C) The enhanced PPR in FAD-affected synapses with respect to WT synapses is exacerbated by stronger coupling. (D)  $Pr$  in response to the second pulse ( $Pr_{\#}$ ) as a function of  $Pr$  following the first pulse ( $Pr_s$ ) shows that the bell-shaped response is marginally affected by the coupling strength.

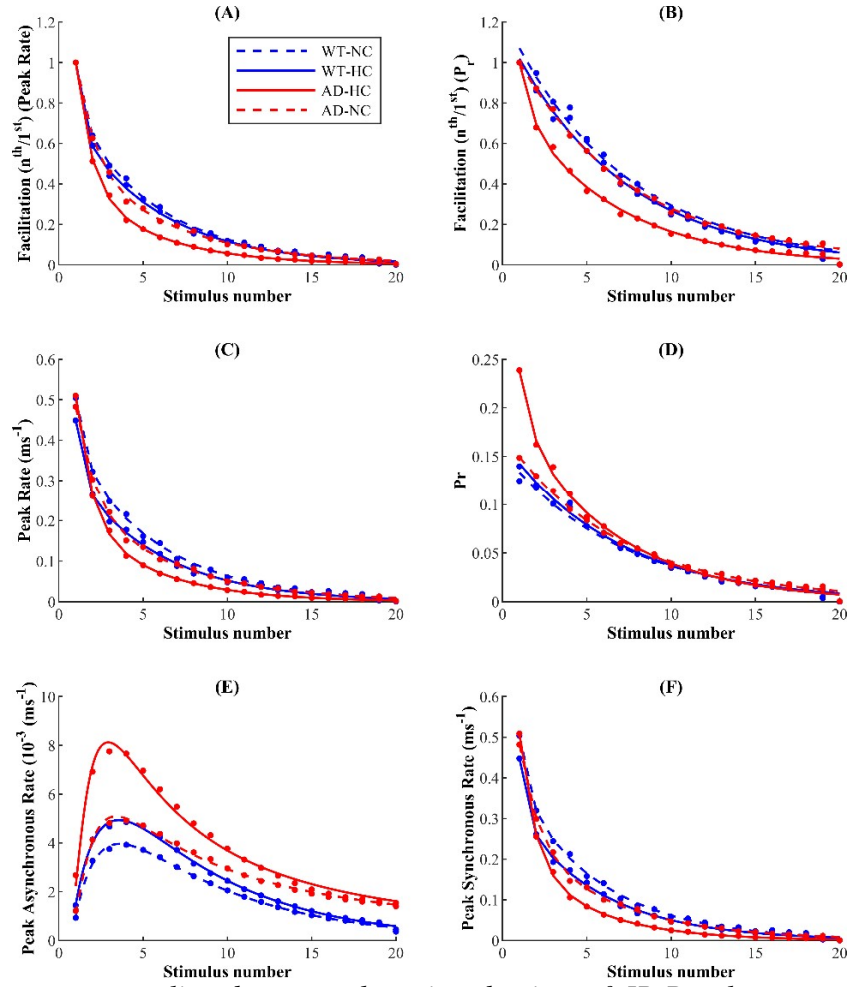

**Figure S4.** Stronger coupling between the microdomain of  $IP_3Rs$  cluster and AZ exacerbate the stronger depression in FAD-affected synapses. Facilitation obtained from peak rate (A) and  $P_r$  (B) shows that HC enhances the synaptic depression in FAD-affected synapses. Peak release rate (C) and  $P_r$  (D) following each AP in the train under different coupling conditions. (E) Asynchronous and (F) peak synchronous release under different coupling conditions.
